# Supplementary material for: Cohort profile of an early life observational cohort in China: Bone and MicroBiOme onset (BAMBOO) study
Source: PubMed Central journal article supplement — BMJ Open. 2024 May 17;14(5):e075417. doi: 10.1136/bmjopen-2023-075417 (PMC11103194; doi:10.1136/bmjopen-2023-075417), 2024-05-17
Supplement: bmjopen-2023-075417supp002.pdf [file bmjopen-2023-075417supp002.pdf]

BAMBOO\_Supplemental material: Microbial abundances

Table with 22 columns (SampleID, NTBF1-NTBF20) and numerous rows listing various bacterial species and their corresponding abundance values across the 20 NTBF categories.
